# Supplementary material
Source: PubMed Central journal article supplement (PMC5323371)
Supplement: NIHMS840976-supplement-Supplemental_Material.pdf [file NIHMS840976-supplement-Supplemental_Material.pdf]

### Non-Permeabilized RMVEC Mas1 Antibody Staining

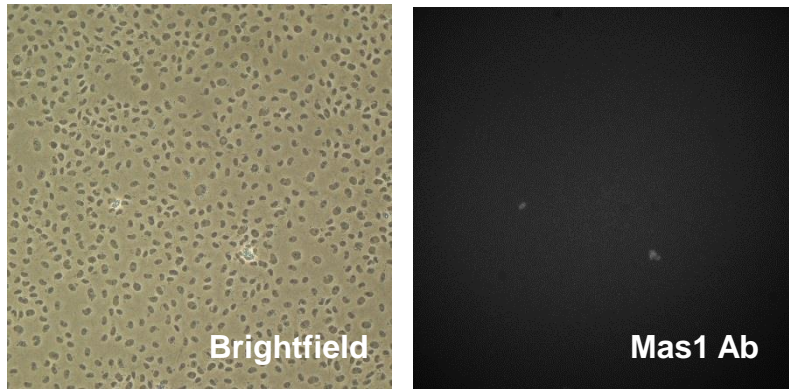

### Permeabilized RMVEC Mas1 Antibody Staining

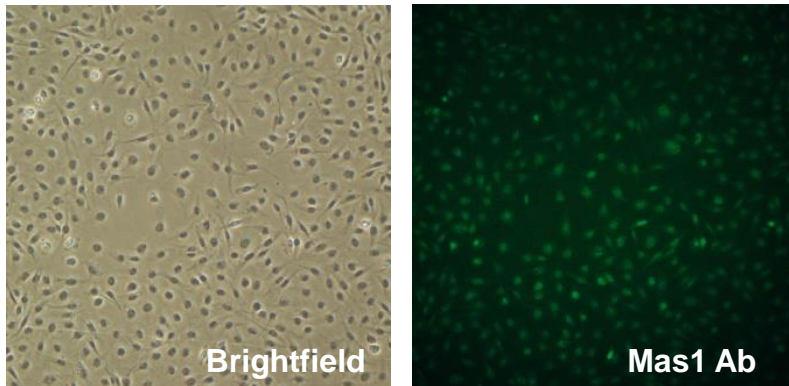

**Supplemental Figure I.** Permeabilized rat microvascular endothelial cells (RMVECs) were imaged by phase contrast brightfield and stained using the Mas1 receptor antibody. Non-permeable RMVECs showed no recognition.

# A Mas1 Immuno-precipitation Antibody Staining

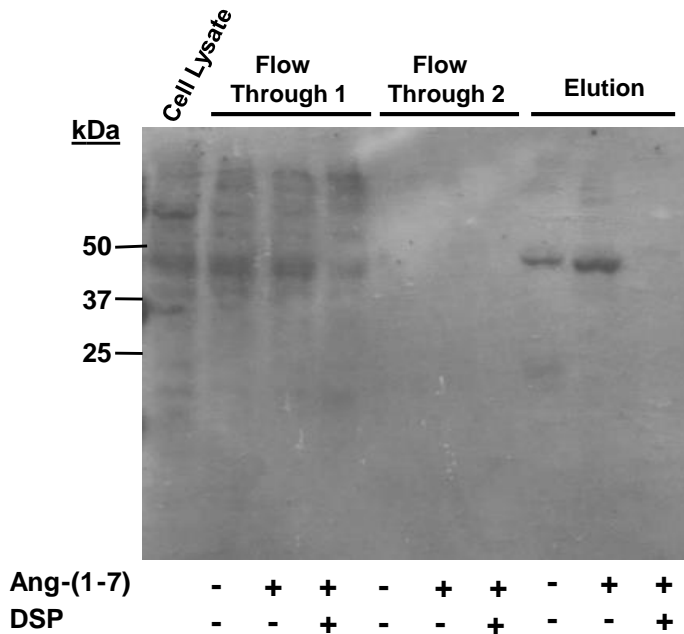

# B

## Predicted MAS1 Peptide Ion Series

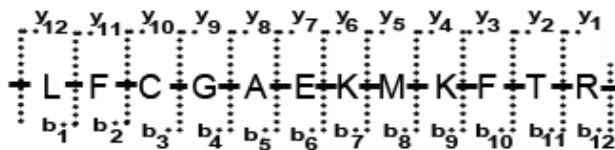

## Detected MAS1 Peptide Ion Series

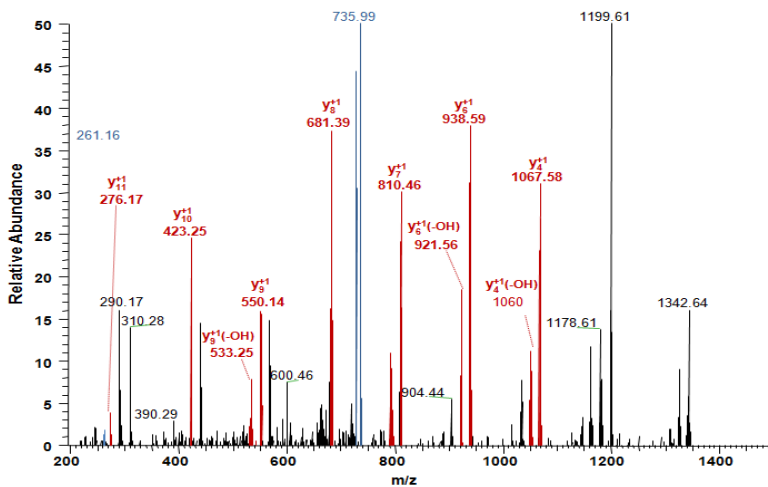

**Supplemental Figure II.** (A) Immuno-blot of the Mas1 immunoprecipitations from Ang-(1-7) stimulated and unstimulated rat microvascular endothelial cells and their respective flow throughs as indicated above/below the image. (B) Predicted and detected Mas1 mass spectra from the Ang-(1-7) stimulated immuno-precipitation is indicated.

**Supplemental Table I.** Comparison data from Ang-(1-7) stimulated Mas1 immunoprecipitation versus the non-stimulated Mas1 immunoprecipitation after application of filters described in the methods.

| Annotation | Description                                                       | Total Peptides | Ang-(1-7) Stim. MAS1 IP Scan Count | No Stim. MAS1 IP Scan Count | NormLog 2Ratio | norm p-value |
|------------|-------------------------------------------------------------------|----------------|------------------------------------|-----------------------------|----------------|--------------|
| Mov10l1    | Putative helicase Mov10l1                                         | 12             | 63                                 | 9                           | -2.342568      | 4.3E-08      |
| Adamts16   | A disintegrin and metalloproteinase with thrombospondin motifs 16 | 22             | 54                                 | 20                          | -0.968172      | 0.00736      |
| AGTR1      | Type-1 angiotensin II receptor                                    | 2              | 19                                 | 26                          | 0.9173         | 0.03368      |
| Ang2       | Angiogenin-2 precursor                                            | 4              | 102                                | 0                           | 1 only         | 5.41E-26     |
| Apc        | Adenomatous polyposis coli protein                                | 55             | 62                                 | 29                          | -0.631428      | 0.04649      |
| Arhgap33   | TC10/CDC42 GTPase-activating protein                              | 11             | 57                                 | 25                          | -0.724246      | 0.03133      |
| Card10     | Caspase recruitment domain-containing protein 10                  | 18             | 35                                 | 14                          | -0.857141      | 0.0513       |
| cb054      | Uncharacterized protein C2orf54 homolog                           | 2              | 29                                 | 0                           | 1 only         | 1.9E-08      |
| Cct7       | T-complex protein 1 subunit eta                                   | 16             | 34                                 | 13                          | -0.922236      | 0.0411       |
| Cd19       | B-lymphocyte antigen CD19                                         | 3              | 30                                 | 0                           | 1 only         | 1.1E-08      |
| Cilp       | Cartilage intermediate layer protein 1                            | 20             | 60                                 | 14                          | -1.634748      | 2.3E-05      |
| Cit        | Citron Rho-interacting kinase                                     | 37             | 54                                 | 24                          | -0.705138      | 0.04063      |
| Cldn11     | Claudin-11                                                        | 5              | 25                                 | 0                           | 1 only         | 1.8E-07      |
| Clta       | Clathrin light chain A                                            | 7              | 57                                 | 22                          | -0.908671      | 0.009        |
| Cntn2      | Contactin-2                                                       | 13             | 76                                 | 35                          | -0.653857      | 0.02301      |
| COL17A1    | Collagen alpha-1(XVII) chain                                      | 24             | 36                                 | 12                          | -1.120175      | 0.01378      |
| Csgalnact2 | Chondroitin beta-1,4-N-acetylgalactosaminyltransferase 2          | 3              | 29                                 | 9                           | -1.223269      | 0.01782      |
| Cyc1       | Cytochrome c1, heme protein                                       | 11             | 27                                 | 9                           | -1.120175      | 0.03293      |
| Cyp4a12a   | Cytochrome P450 4A12                                              | 7              | 26                                 | 4                           | -2.235652      | 0.00062      |
| Diaph2     | Protein diaphanous homolog 2                                      | 17             | 32                                 | 9                           | -1.365288      | 0.00677      |
| Eif2d      | Ligatin (EIF2D)                                                   | 12             | 27                                 | 8                           | -1.2901        | 0.01721      |
| Eppk1      | Epiplakin                                                         | 50             | 128                                | 36                          | -1.365288      | 6.1E-08      |
| Fgd6       | FYVE, RhoGEF and PH domain-containing protein 6                   | 19             | 51                                 | 13                          | -1.507198      | 0.00023      |
| Fis1       | Tetratricopeptide repeat protein 11                               | 5              | 26                                 | 0                           | 1 only         | 1E-07        |
| Flna       | Filamin-A                                                         | 134            | 1329                               | 770                         | -0.322623      | 6.3E-07      |
| Flt3       | Receptor-type tyrosine-protein kinase FLT3                        | 7              | 60                                 | 28                          | -0.634748      | 0.04911      |
| Gfap       | Glial fibrillary acidic protein                                   | 7              | 148                                | 55                          | -0.963306      | 1E-05        |
| Grin1      | Glutamate receptor ionotropic, NMDA 1                             | 16             | 43                                 | 14                          | -1.154122      | 0.00584      |
| Grip1      | Glutamate receptor-interacting protein 1                          | 16             | 28                                 | 10                          | -1.020639      | 0.0439       |
| Klk1b24    | Glandular kallikrein K24 precursor                                | 2              | 37                                 | 0                           | 1 only         | 2.1E-10      |

|           |                                                                  |    |     |    |           |         |
|-----------|------------------------------------------------------------------|----|-----|----|-----------|---------|
| Klra8     | Killer cell lectin-like receptor 8                               | 7  | 64  | 26 | -0.834773 | 0.00996 |
| Matn2     | Matrilin-2 precursor                                             | 18 | 162 | 41 | -1.517511 | 4.4E-11 |
| Mical1    | Protein-methionine sulfoxide oxidase                             | 12 | 67  | 23 | -1.07774  | 0.00112 |
| Mrgpra    | Mas-related G-protein coupled receptor member A                  | 4  | 13  | 0  | 1 only    | 0.00017 |
| Mtor      | Mammalian target of rapamycin (MTOR)                             | 29 | 53  | 16 | -1.263133 | 0.00102 |
| Notch4    | Neurogenic locus notch homolog protein 4                         | 31 | 33  | 8  | -1.579607 | 0.0022  |
| Ppp1r3a   | Protein phosphatase 1 regulatory subunit 3A                      | 13 | 93  | 46 | -0.55081  | 0.03089 |
| Prkd1     | Protein kinase D1                                                | 13 | 25  | 5  | -1.857141 | 0.00287 |
| Pskh1     | Serine/threonine-protein kinase H1                               | 12 | 52  | 20 | -0.913724 | 0.01219 |
| Rasal1    | RasGAP-activating-like protein 1                                 | 13 | 66  | 32 | -0.579607 | 0.05698 |
| Rasgrf1   | Ras-specific nucleotide exchange factor CDC25                    | 27 | 26  | 9  | -1.065727 | 0.04432 |
| Rp1       | Oxygen-regulated protein 1                                       | 34 | 56  | 23 | -0.819006 | 0.01769 |
| Rwdd2b    | Protein C21orf6 homolog                                          | 4  | 74  | 0  | 1 only    | 2.7E-19 |
| Scel      | Sciellin                                                         | 14 | 27  | 9  | -1.120175 | 0.03293 |
| Serpina3k | Contrapsin-like protease inhibitor 1 precursor                   | 7  | 32  | 5  | -2.213285 | 0.00016 |
| Skor1     | Ladybird homeobox corepressor 1                                  | 19 | 34  | 12 | -1.037713 | 0.02441 |
| Tnfsf10   | Tumor necrosis factor ligand superfamily member 10               | 3  | 68  | 13 | -1.922236 | 4.9E-07 |
| Trpm6     | Transient receptor potential cation channel subfamily M member 6 | 23 | 26  | 7  | -1.428297 | 0.01158 |
| Ywhaq     | 14-3-3 protein theta (14-3-3 protein tau)                        | 6  | 47  | 0  | 1 only    | 8.2E-13 |
| Zfyve16   | Zinc finger FYVE domain-containing protein 16                    | 16 | 36  | 6  | -2.120175 | 9.7E-05 |
