# Supplementary material
Source: PubMed Central journal article supplement (PMC5323371)

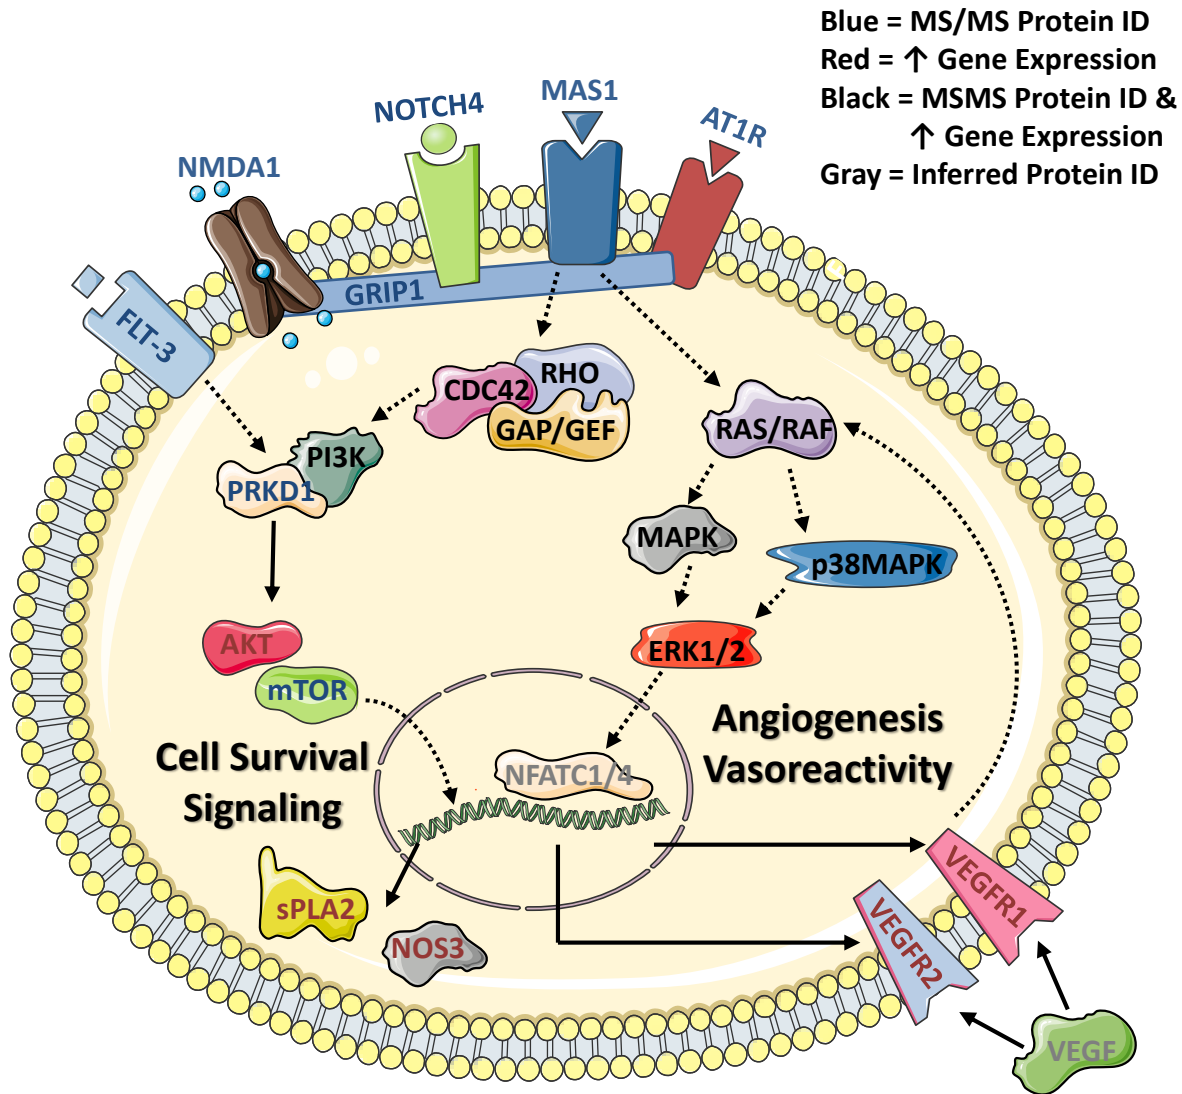

Supplement: NIHMS840976-supplement-Graphic_Abstract.pdf [file NIHMS840976-supplement-Graphic_Abstract.pdf]
